# Supplementary material for: Highly efficient Ag6Si2O7/WO3 photocatalyst based on heterojunction with enhanced visible light photocatalytic activities
Source: Royal Society of Chemistry journal article supplement (doi:10.1039/c6ra23591c), 2016-01-01
Supplement: c6ra23591c1.pdf [file c6ra23591c1.pdf]

## Supporting Information

### **Highly efficient $\text{Ag}_6\text{Si}_2\text{O}_7/\text{WO}_3$ photocatalyst based on heterojunction with enhanced visible light photocatalytic activities**

Yonggang Hu, Hong Zheng\*, Tongzhou Xu, Ning Xu, Hongwen Ma\*

Beijing Key Laboratory of Materials Utilization of Nonmetallic Minerals and Solid  
Wastes, National Laboratory of Mineral Materials, School of Materials Science and  
Technology, China University of Geosciences, Beijing 100083, China

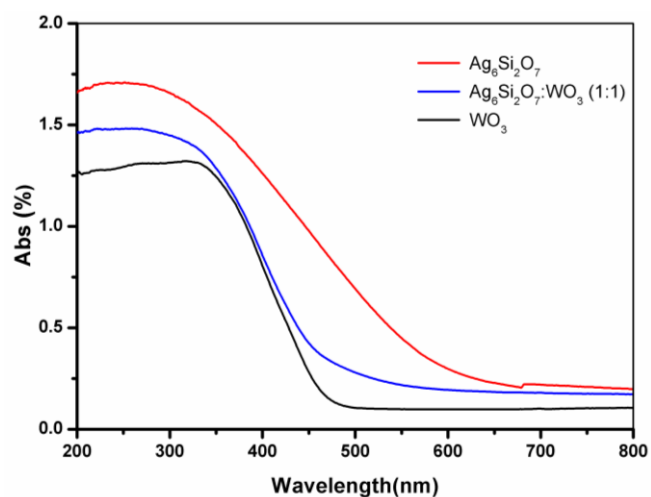

**Fig.S1** UV-vis diffuse reflectance spectra of  $\text{WO}_3$ ,  $\text{Ag}_6\text{Si}_2\text{O}_7$  and  $\text{Ag}_6\text{Si}_2\text{O}_7/\text{WO}_3$  (1:1) composite.

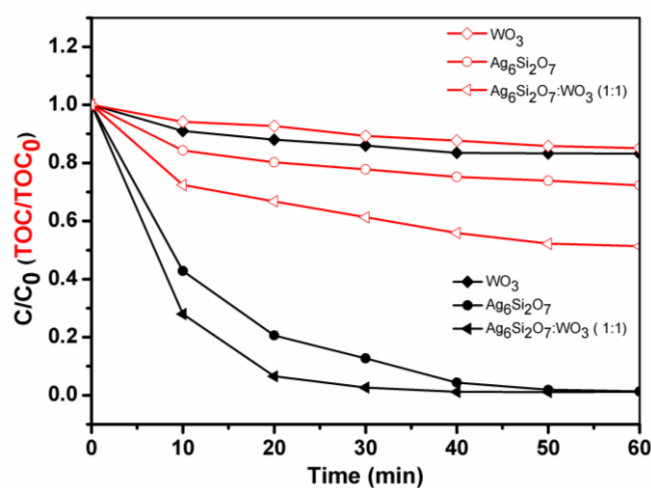

**Fig. S2** The comparison of decolorization and mineralization of MB over  $\text{Ag}_6\text{Si}_2\text{O}_7$ ,  $\text{WO}_3$  and  $\text{Ag}_6\text{Si}_2\text{O}_7/\text{WO}_3$  (1:1) composite under visible light irradiation.

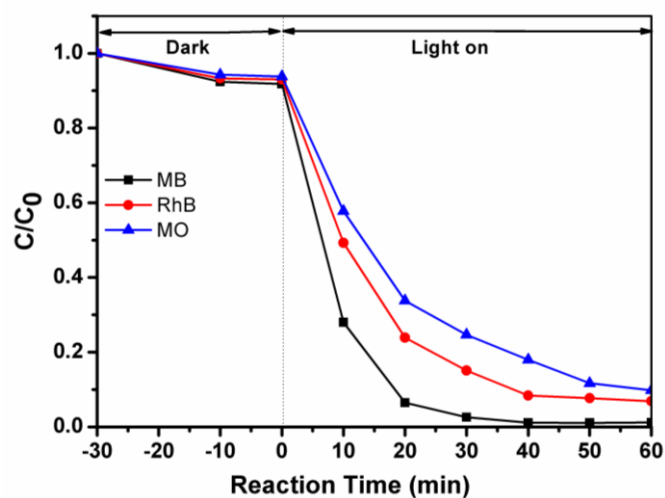

**Fig.S3** Photocatalytic degradation of MB, MO and RhB by  $\text{Ag}_6\text{Si}_2\text{O}_7/\text{WO}_3$ (1:1) composite under visible light irradiation.

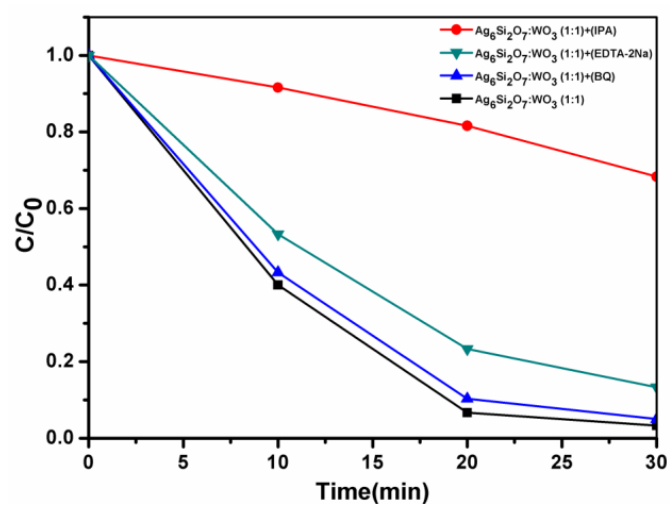

**Fig.S4** Active species trapping experiments of the  $\text{Ag}_6\text{Si}_2\text{O}_7/\text{WO}_3$  (1:1) heterojunction photocatalyst under visible light irradiation.
